# Supplementary material for: The Role of Nrf2 Activity in Cancer Development and Progression
Source: PubMed Central journal article supplement (PMC6896028; doi:10.3390/cancers11111755), 2019-11-08
Supplement: cancers-11-01755-s001.pdf [file cancers-11-01755-s001.pdf]

**Table S1.** Full list of Nrf2 targets included in our analysis.

| ENSEMBL_GENE_ID | Gene Name                                                          |
|-----------------|--------------------------------------------------------------------|
| ENSG00000196139 | aldo-keto reductase family 1 member C3(AKR1C3)                     |
| ENSG00000138109 | cytochrome P450 family 2 subfamily C member 9(CYP2C9)              |
| ENSG00000242515 | UDP glucuronosyltransferase family 1 member A10(UGT1A10)           |
| ENSG00000103222 | ATP binding cassette subfamily C member 1(ABCC1)                   |
| ENSG00000143149 | aldehyde dehydrogenase 9 family member A1(ALDH9A1)                 |
| ENSG00000170899 | glutathione S-transferase alpha 4(GSTA4)                           |
| ENSG00000106258 | cytochrome P450 family 3 subfamily A member 5(CYP3A5)              |
| ENSG00000231852 | cytochrome P450 family 21 subfamily A member 2(CYP21A2)            |
| ENSG00000140465 | cytochrome P450 family 1 subfamily A member 1(CYP1A1)              |
| ENSG00000114770 | ATP binding cassette subfamily C member 5(ABCC5)                   |
| ENSG00000224586 | glutathione peroxidase 5(GPX5)                                     |
| ENSG00000196616 | alcohol dehydrogenase 1B (class I), beta polypeptide(ADH1B)        |
| ENSG00000106605 | biliverdin reductase A(BLVRA)                                      |
| ENSG00000167996 | ferritin heavy chain 1(FTH1)                                       |
| ENSG00000240224 | UDP glucuronosyltransferase family 1 member A5(UGT1A5)             |
| ENSG00000276950 | glutathione S-transferase theta pseudogene 1(GSTTP1)               |
| ENSG00000087086 | ferritin light chain(FTL)                                          |
| ENSG00000165092 | aldehyde dehydrogenase 1 family member A1(ALDH1A1)                 |
| ENSG00000165841 | cytochrome P450 family 2 subfamily C member 19(CYP2C19)            |
| ENSG00000117448 | aldo-keto reductase family 1 member A1(AKR1A1)                     |
| ENSG00000171428 | N-acetyltransferase 1(NAT1)                                        |
| ENSG00000138061 | cytochrome P450 family 1 subfamily B member 1(CYP1B1)              |
| ENSG00000109193 | sulfotransferase family 1E member 1(SULT1E1)                       |
| ENSG00000001084 | glutamate-cysteine ligase catalytic subunit(GCLC)                  |
| ENSG00000140505 | cytochrome P450 family 1 subfamily A member 2(CYP1A2)              |
| ENSG00000241119 | UDP glucuronosyltransferase family 1 member A9(UGT1A9)             |
| ENSG00000160868 | cytochrome P450 family 3 subfamily A member 4(CYP3A4)              |
| ENSG00000125257 | ATP binding cassette subfamily C member 4(ABCC4)                   |
| ENSG00000167468 | glutathione peroxidase 4(GPX4)                                     |
| ENSG00000111275 | aldehyde dehydrogenase 2 family (mitochondrial)(ALDH2)             |
| ENSG00000186350 | retinoid X receptor alpha(RXRA)                                    |
| ENSG00000196344 | alcohol dehydrogenase 7 (class IV), mu or sigma polypeptide (ADH7) |
| ENSG00000105227 | periaxin(PRX)                                                      |
| ENSG00000142657 | phosphogluconate dehydrogenase(PGD)                                |
| ENSG00000099984 | glutathione S-transferase theta 2 (gene/pseudogene)(GSTT2)         |
| ENSG00000053371 | aldo-keto reductase family 7 member A2(AKR7A2)                     |
| ENSG00000136810 | thioredoxin(TXN)                                                   |
| ENSG00000197448 | glutathione S-transferase kappa 1(GSTK1)                           |
| ENSG00000134184 | glutathione S-transferase mu 1(GSTM1)                              |
| ENSG00000121270 | ATP binding cassette subfamily C member 11(ABCC11)                 |
| ENSG00000105398 | sulfotransferase family 2A member 1(SULT2A1)                       |
| ENSG00000245848 | CCAAT/enhancer binding protein alpha(CEBPA)                        |

---

|                 |                                                              |
|-----------------|--------------------------------------------------------------|
| ENSG00000138413 | isocitrate dehydrogenase (NADP(+)) 1, cytosolic(IDH1)        |
| ENSG00000085563 | ATP binding cassette subfamily B member 1(ABCB1)             |
| ENSG00000198704 | glutathione peroxidase 6(GPX6)                               |
| ENSG00000128918 | aldehyde dehydrogenase 1 family member A2(ALDH1A2)           |
| ENSG00000187758 | alcohol dehydrogenase 1A (class I), alpha polypeptide(ADH1A) |
| ENSG00000119711 | aldehyde dehydrogenase 6 family member A1(ALDH6A1)           |
| ENSG00000172831 | carboxylesterase 2(CES2)                                     |
| ENSG00000066926 | ferrochelatase(FECH)                                         |
| ENSG00000091262 | ATP binding cassette subfamily C member 6(ABCC6)             |
| ENSG00000211445 | glutathione peroxidase 3(GPX3)                               |
| ENSG00000278540 | acetyl-CoA carboxylase alpha(ACACA)                          |
| ENSG00000243955 | glutathione S-transferase alpha 1(GSTA1)                     |
| ENSG00000124574 | ATP binding cassette subfamily C member 10(ABCC10)           |
| ENSG00000128059 | phosphoribosyl pyrophosphate amidotransferase(PPAT)          |
| ENSG00000099194 | stearoyl-CoA desaturase(SCD)                                 |
| ENSG00000104687 | glutathione-disulfide reductase(GSR)                         |
| ENSG00000151632 | aldo-keto reductase family 1 member C2(AKR1C2)               |
| ENSG00000023839 | ATP binding cassette subfamily C member 2(ABCC2)             |
| ENSG00000168765 | glutathione S-transferase mu 4(GSTM4)                        |
| ENSG00000148795 | cytochrome P450 family 17 subfamily A member 1(CYP17A1)      |
| ENSG00000100577 | glutathione S-transferase zeta 1(GSTZ1)                      |
| ENSG00000160211 | glucose-6-phosphate dehydrogenase(G6PD)                      |
| ENSG00000197894 | alcohol dehydrogenase 5 (class III), chi polypeptide(ADH5)   |
| ENSG00000198610 | aldo-keto reductase family 1 member C4(AKR1C4)               |
| ENSG00000137869 | cytochrome P450 family 19 subfamily A member 1(CYP19A1)      |
| ENSG00000159228 | carbonyl reductase 1(CBR1)                                   |
| ENSG00000143819 | epoxide hydrolase 1(EPHX1)                                   |
| ENSG00000108602 | aldehyde dehydrogenase 3 family member A1(ALDH3A1)           |
| ENSG00000132170 | peroxisome proliferator activated receptor gamma(PPARG)      |
| ENSG00000271303 | sulfiredoxin 1(SRXN1)                                        |
| ENSG00000213366 | glutathione S-transferase mu 2(GSTM2)                        |
| ENSG00000006071 | ATP binding cassette subfamily C member 8(ABCC8)             |
| ENSG00000131473 | ATP citrate lyase(ACLY)                                      |
| ENSG00000187134 | aldo-keto reductase family 1 member C1(AKR1C1)               |
| ENSG00000165568 | aldo-keto reductase family 1 member E2(AKR1E2)               |
| ENSG00000106546 | aryl hydrocarbon receptor(AHR)                               |
| ENSG00000084207 | glutathione S-transferase pi 1(GSTP1)                        |
| ENSG00000169710 | fatty acid synthase(FASN)                                    |
| ENSG00000072210 | aldehyde dehydrogenase 3 family member A2(ALDH3A2)           |
| ENSG00000244122 | UDP glucuronosyltransferase family 1 member A7(UGT1A7)       |
| ENSG00000233276 | glutathione peroxidase 1(GPX1)                               |
| ENSG00000176153 | glutathione peroxidase 2(GPX2)                               |
| ENSG00000164904 | aldehyde dehydrogenase 7 family member A1(ALDH7A1)           |
| ENSG00000065833 | malic enzyme 1(ME1)                                          |
| ENSG00000100292 | heme oxygenase 1(HMOX1)                                      |
| ENSG00000174156 | glutathione S-transferase alpha 3(GSTA3)                     |
| ENSG00000163931 | transketolase(TKT)                                           |

---

---

|                 |                                                                                                                 |
|-----------------|-----------------------------------------------------------------------------------------------------------------|
| ENSG00000248144 | alcohol dehydrogenase 1C (class I), gamma polypeptide(ADH1C)                                                    |
| ENSG00000088002 | sulfotransferase family 2B member 1(SULT2B1)                                                                    |
| ENSG00000130649 | cytochrome P450 family 2 subfamily E member 1(CYP2E1)                                                           |
| ENSG00000116157 | glutathione peroxidase 7(GPX7)                                                                                  |
| ENSG00000181019 | NAD(P)H quinone dehydrogenase 1(NQO1)                                                                           |
| ENSG00000100197 | cytochrome P450 family 2 subfamily D member 6(CYP2D6)                                                           |
| ENSG00000255974 | cytochrome P450 family 2 subfamily A member 6(CYP2A6)                                                           |
| ENSG00000198431 | thioredoxin reductase 1(TXNRD1)                                                                                 |
| ENSG00000159423 | aldehyde dehydrogenase 4 family member A1(ALDH4A1)                                                              |
| ENSG00000134201 | glutathione S-transferase mu 5(GSTM5)                                                                           |
| ENSG00000134538 | solute carrier organic anion transporter family member 1B1 (SLCO1B1)                                            |
| ENSG00000142168 | superoxide dismutase 1, soluble(SOD1)                                                                           |
| ENSG00000242366 | UDP glucuronosyltransferase family 1 member A8(UGT1A8)                                                          |
| ENSG00000134202 | glutathione S-transferase mu 3(GSTM3)                                                                           |
| ENSG00000241635 | UDP glucuronosyltransferase family 1 member A1(UGT1A1)                                                          |
| ENSG00000164294 | glutathione peroxidase 8 (putative)(GPX8)                                                                       |
| ENSG00000243135 | UDP glucuronosyltransferase family 1 member A3(UGT1A3)                                                          |
| ENSG00000108846 | ATP binding cassette subfamily C member 3(ABCC3)                                                                |
| ENSG00000177156 | transaldolase 1(TALDO1)                                                                                         |
| ENSG00000261052 | sulfotransferase family 1A member 3(SULT1A3)                                                                    |
| ENSG00000148834 | glutathione S-transferase omega 1(GSTO1)                                                                        |
| ENSG00000156006 | N-acetyltransferase 2(NAT2)                                                                                     |
| ENSG00000065911 | methylenetetrahydrofolate dehydrogenase (NADP+ dependent) 2,<br>methenyltetrahydrofolate cyclohydrolase(MTHFD2) |
| ENSG00000244067 | glutathione S-transferase alpha 2(GSTA2)                                                                        |
| ENSG00000138780 | glutathione S-transferase C-terminal domain containing(GSTCD)                                                   |
| ENSG00000198848 | carboxylesterase 1(CES1)                                                                                        |
| ENSG00000197408 | cytochrome P450 family 2 subfamily B member 6(CYP2B6)                                                           |
| ENSG00000023909 | glutamate-cysteine ligase modifier subunit(GCLM)                                                                |

---
